# Supplementary figures and images for: Analysis of miRNAs in the Heads of Different Castes of the Bumblebee Bombus lantschouensis (Hymenoptera: Apidae)
Source: MDPI journal article supplement (doi:10.3390/insects10100349), 2019-10-16

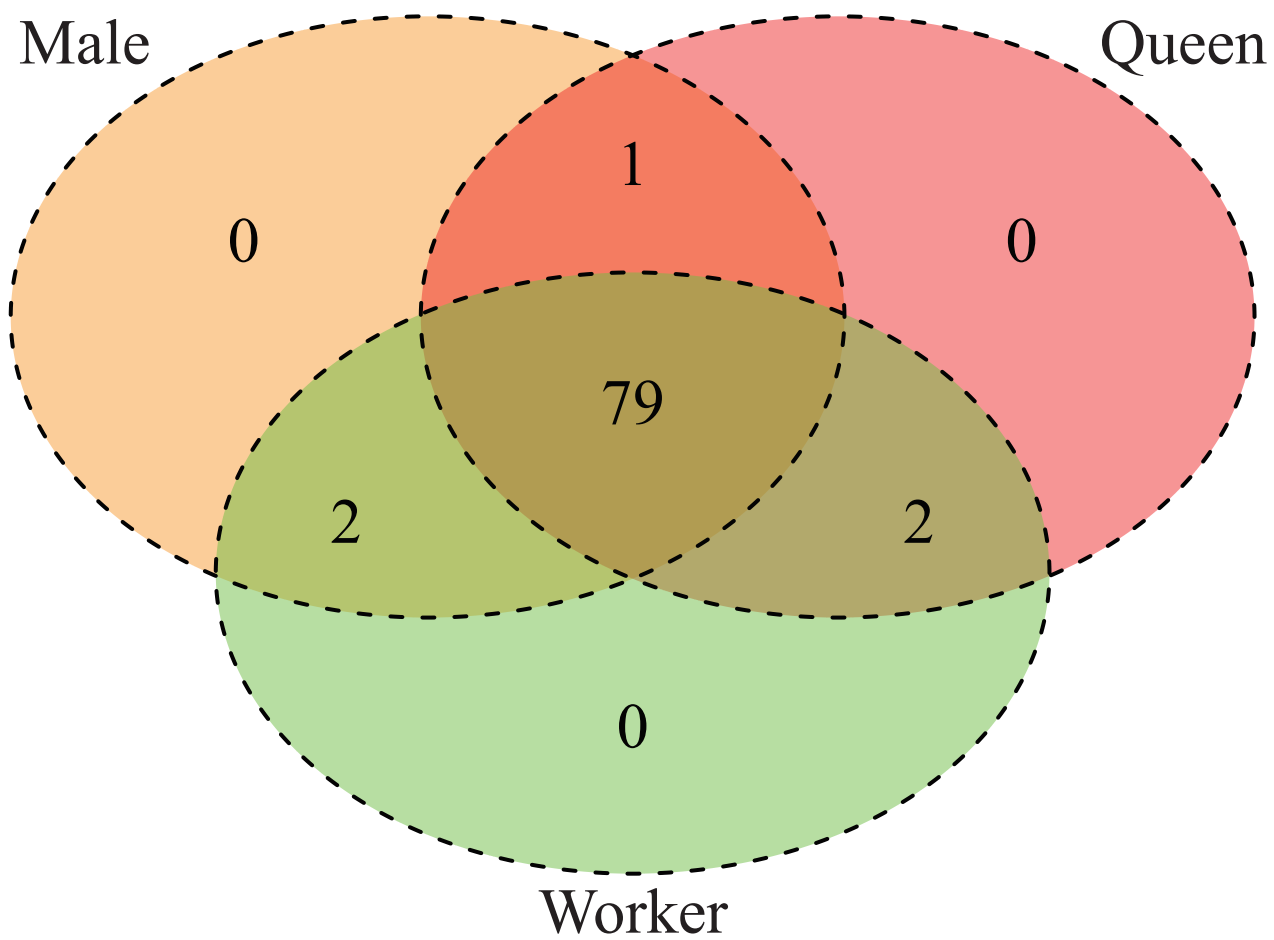

Supplement: s1 [file s1]

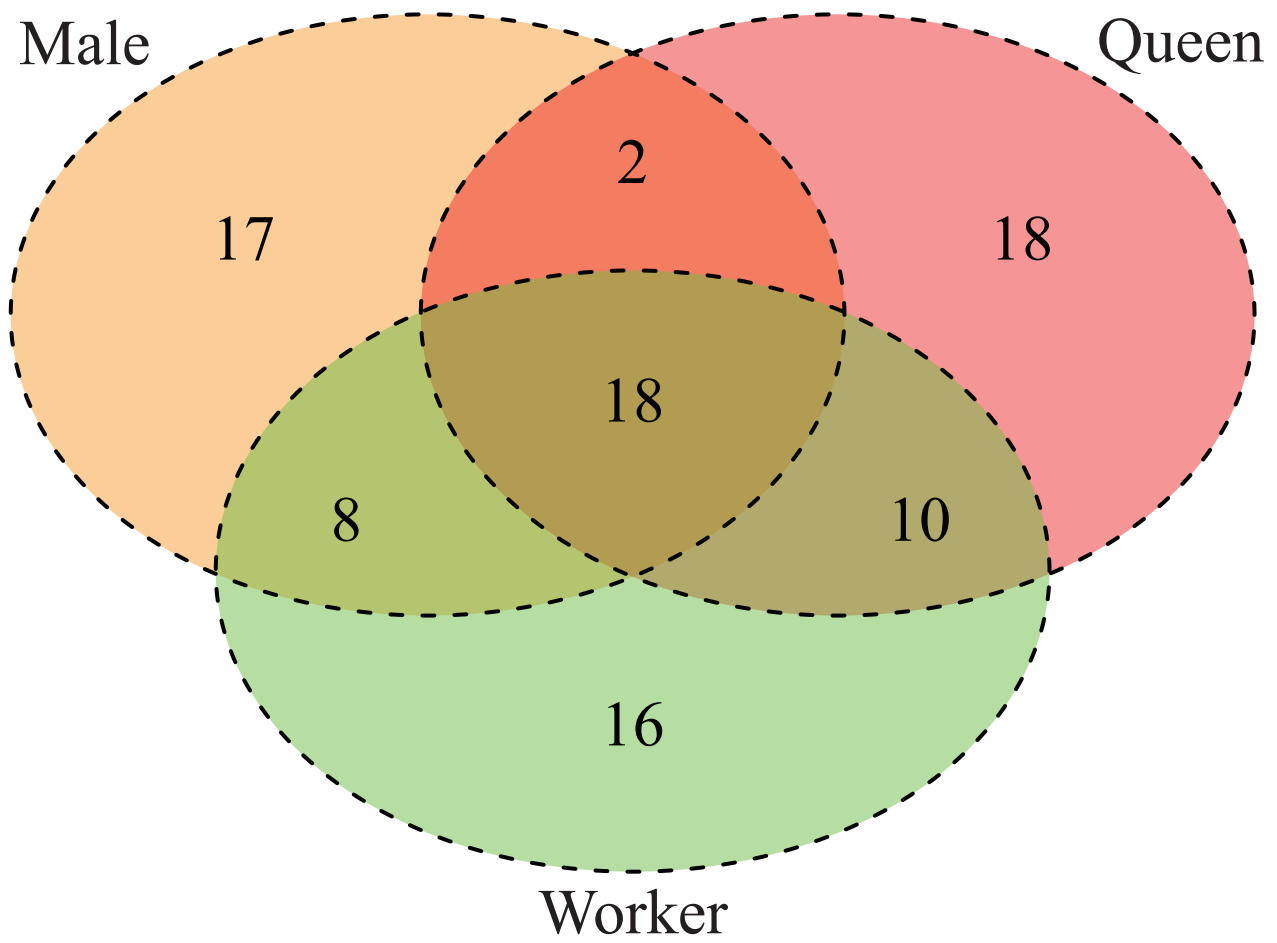

Supplement: s1 [file s1]
